# Supplementary material
Source: PubMed Central journal article supplement (PMC10701663)
Supplement: jamacardiol-e234520-s001.pdf [file jamacardiol-e234520-s001.pdf]

## Supplementary Online Content

Ghosh AK, Venkatraman S, Nanna MG, et al. Risk prediction for atherosclerotic cardiovascular disease with and without race stratification. *JAMA Cardiol*. Published online December 6, 2023. doi:10.1001/jamacardio.2023.4520

**eFigure.** Exclusion Cascade of REGARDS Participants

**eTable.** Number of Missing Observations in Baseline Characteristics of REGARDS-MI Participants by Race-Sex Strata

This supplementary material has been provided by the authors to give readers additional information about their work.

**eFigure.** Exclusion cascade of REGARDS participants

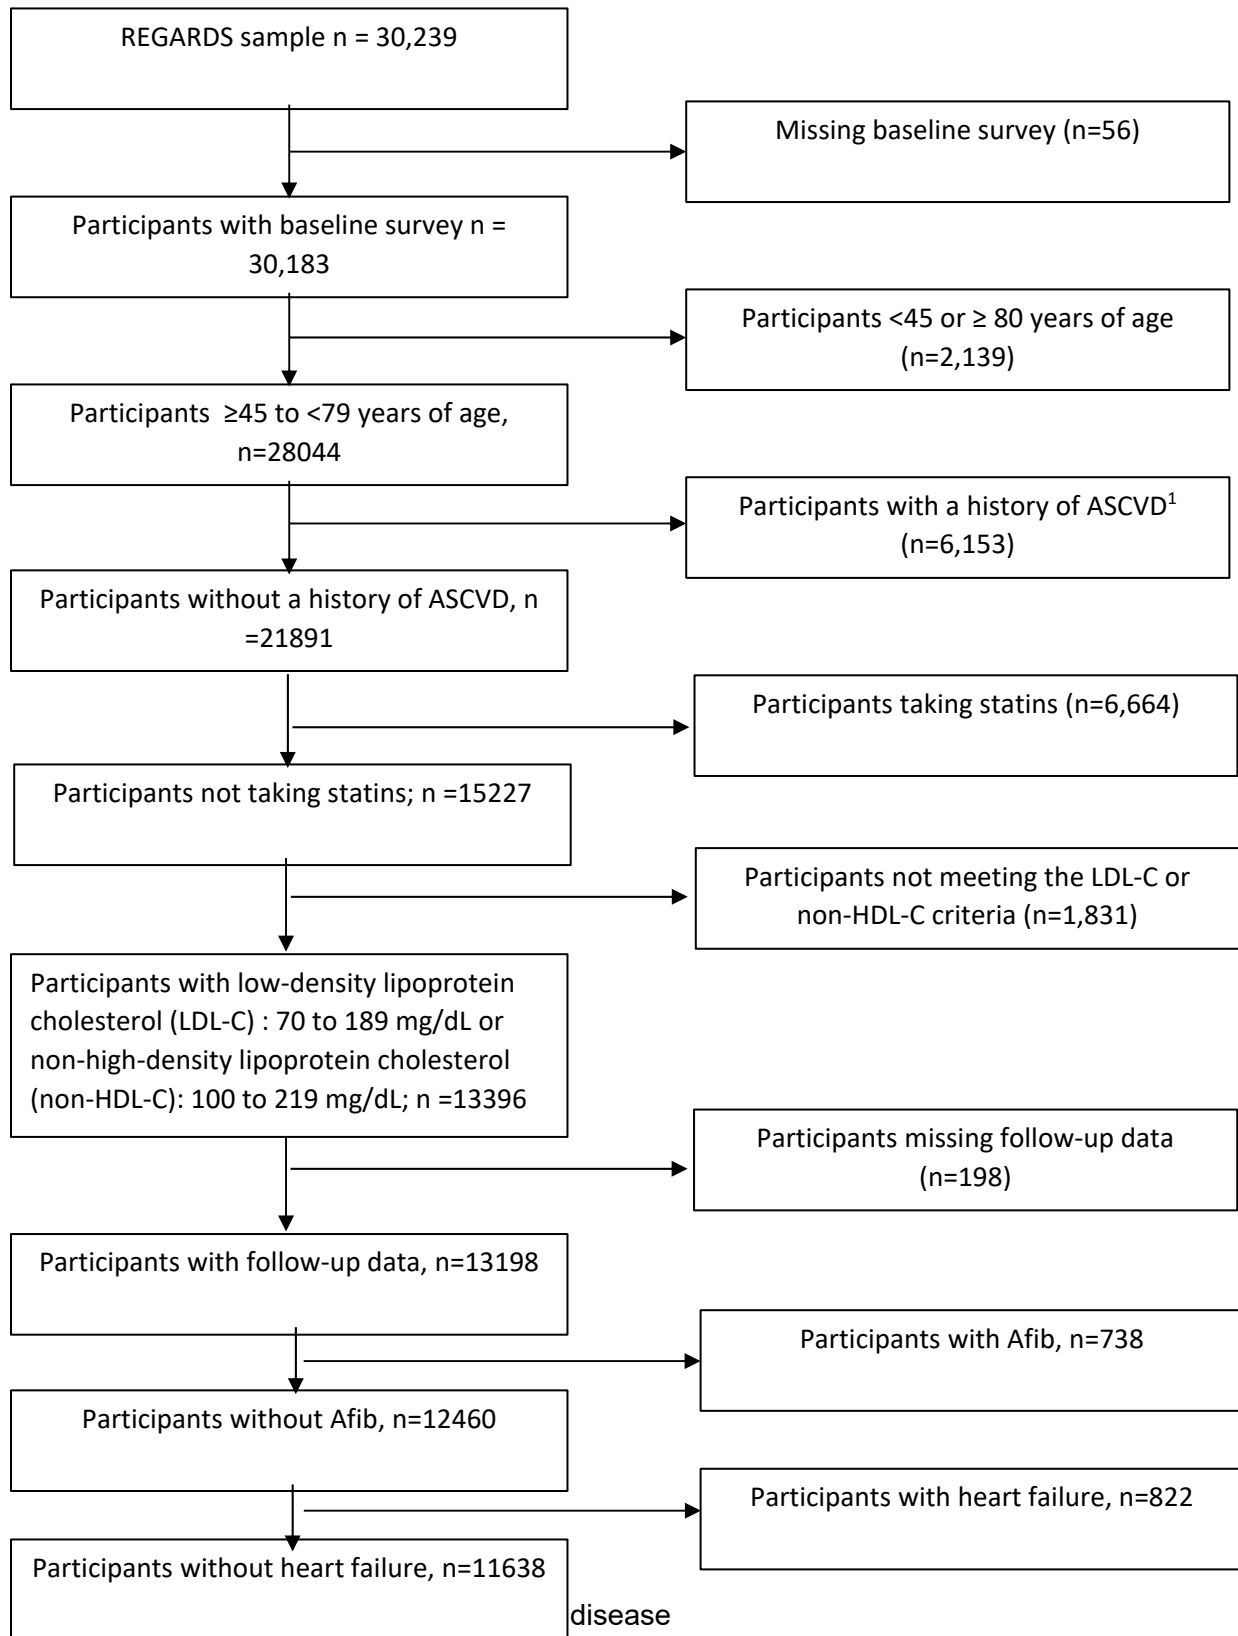

**eTable.** Number of missing observations in baseline characteristics of REGARDS-MI participants by race-sex strata

|                                                                        | Race-Sex Strata |      |        |      | Total |
|------------------------------------------------------------------------|-----------------|------|--------|------|-------|
|                                                                        | Black           |      | White  |      |       |
|                                                                        | Female          | Male | Female | Male |       |
| Age                                                                    | 0               | 0    | 0      | 0    | 0     |
| Cholesterol                                                            | 0               | 0    | 0      | 0    | 0     |
| High Density Lipoprotein (mg/dL)                                       | 0               | 0    | 0      | 0    | 0     |
| Systolic Blood Pressure,* mean (SD)                                    | 9               | 5    | 9      | 10   | 33    |
| Taking anti-hypertensive agents                                        | 143             | 84   | 185    | 184  | 596   |
| Proportion of smokers,† %                                              | 16              | 11   | 11     | 8    | 46    |
| Proportion with diabetes,‡ %                                           | 19              | 11   | 24     | 16   | 70    |
| Proportion of low income,   %                                          | 413             | 178  | 645    | 282  | 1518  |
| Proportion with low educational status,§ %                             | 2               | 0    | 1      | 0    | 3     |
| Proportion with ZIP code in poverty, <sup>1</sup> %                    | 20              | 11   | 85     | 65   | 181   |
| Proportion without health insurance, <sup>2</sup> %                    | 4               | 3    | 3      | 4    | 14    |
| Proportion of participants with no social visits, <sup>3</sup> %       | 61              | 53   | 46     | 48   | 208   |
| Health Professional Shortage Area category <sup>4</sup>                | 0               | 0    | 1      | 1    | 2     |
| Residing in states with poor public health infrastructure <sup>5</sup> | 0               | 0    | 0      | 0    | 0     |
| Rural <sup>6</sup>                                                     | 283             | 123  | 516    | 375  | 1297  |
| Area deprivation index (ADI) <sup>7</sup>                              | 23              | 16   | 73     | 52   | 164   |
| Dissimilarity Index (DI) <sup>8</sup>                                  | 0               | 0    | 2      | 0    | 2     |

\*Includes patients who report taking anti-hypertensive agents

† Defined by self-report

‡ Defined as diabetic by self-report or fasting glucose  $\geq$  126mg/dL or non-fasting glucose  $\geq$  20mg/dL or taking insulin or other anti-glycemic medications

|| Low income defined as participant's annual income  $\leq$  \$35,000 in non inflation-adjusted dollars.

§ Low educational status defined as participant has less than high school education

<sup>1</sup> ZIP code in poverty defined as ZIP code where  $>$  25% of residents' income in that ZIP code is below the Federal Poverty Line

<sup>2</sup> Participants without health insurance defined as having neither full nor partial health insurance.

<sup>3</sup> Social visits are defined as participants do not see family nor friends at least once per month

<sup>4</sup> Participant resides in county defined by Health Resources and Services Administration as having health professional shortage

<sup>5</sup> Defined as states in lowest quintiles in at least 80% of decade prior to REGARDS enrollment as per America's Health Ranking (AHR)

<sup>6</sup> Defined by Rural Urban Commuting Area Codes (RUCA) from 2000 US Census. Rural defined as RUCA  $\geq$  9 (where RUCA 9 = small town low community: primary flow 10%-30% to a small urban center [UC]; RUCA 10 = Rural areas; primary flow to a tract outside an urban area [UA] or UC)

<sup>7</sup> Multi-variable measure of census block group disadvantage in national percentile rankings, where 1 is lowest ADI representing most disadvantaged census block groups nationally, and 100 represents the highest ADI, representing least disadvantaged census block groups nationally.

<sup>8</sup> Measure of residential racial segregation at the state level from 2000 Census, defined as the population of Black residents that need to change counties to have an equal proportion of White and Black residents in each county
