# Supplementary material
Source: PubMed Central journal article supplement (PMC10701663)
Supplement: jamacardiol-e234520-s002.pdf [file jamacardiol-e234520-s002.pdf]

## Data Sharing Statement

Ghosh. Risk Prediction for Atherosclerotic Cardiovascular Disease With and Without Race Stratification. *JAMA Cardiol.* Published December 06, 2023.

doi:10.1001/jamacardio.2023.4520

### Data

**Data available:** No

### Additional Information

**Explanation for why data not available:** Data access requires a formal application to the REGARDS Committee
